# Supplementary material for: A SARS-CoV-2 Mpro mutation conferring ensitrelvir resistance paradoxically increases nirmatrelvir susceptibility
Source: Research Square preprint supplement (doi:10.21203/rs.3.rs-6449068/v1), 2025-04-21

## 1    **Extended Data Fig and table**

2    Extended Data Table 1 X-ray crystallography data collection and refinement statistics.

3    Extended Data Fig. 1: Size exclusion chromatography (SEC) elution profiles of SARS-CoV-2  
4    M<sup>pro</sup> wild-type and mutants (T45I, Δ23G and Δ23G/T45I).

5    Extended Data Fig. 2: Electron density map showing the nirmatrelvir-binding site of SARS-  
6    CoV-2 M<sup>pro</sup> mutants Δ23G and Δ23G/T45I.

7    Extended Data Fig. 3: Structural comparison of SARS-CoV-2 M<sup>pro</sup> mutants (Δ23G,  
8    Δ23G/T45I) and wild-type M<sup>pro</sup> bound to various inhibitors.

9    Extended Data Fig. 4: Histopathological assessment of nasal turbinate and lung tissues in  
10    Syrian golden hamsters infected with recombinant SARS-CoV-2 variants.

11    Extended Data Fig. 5: Genetic stability of recombinant SARS-CoV-2 variants after serial  
12    passaging in vitro.

13    Extended Data Fig. 6: Global sequence analysis of SARS-CoV-2 M<sup>pro</sup> residues 23 and 45.

14

**Extended Data Table 1 X-ray crystallography data collection and refinement statistics.**

|                                                        | SARS-CoV-2<br>M <sup>pro</sup> -Δ23G | SARS-CoV-2<br>M <sup>pro</sup> -Δ23G:<br>nirmatrelvir | SARS-CoV-2<br>M <sup>pro</sup> -Δ23G/T45I:<br>nirmatrelvir | SARS-CoV-2<br>M <sup>pro</sup> -Δ23G/T45I:<br>nirmatrelvir |
|--------------------------------------------------------|--------------------------------------|-------------------------------------------------------|------------------------------------------------------------|------------------------------------------------------------|
| <b>Data collection</b>                                 |                                      |                                                       |                                                            |                                                            |
| Beam Line                                              | PLS BL-5C                            |                                                       |                                                            |                                                            |
| Wavelength, Å                                          | 0.9793                               |                                                       | 1.0000                                                     |                                                            |
| Space group                                            | C2                                   | C2                                                    | C2                                                         | P2 <sub>1</sub>                                            |
| Unit cell<br>parameters                                |                                      |                                                       |                                                            |                                                            |
| a, b, c (Å)                                            | 114.0; 53.9; 44.4                    | 115.3; 53.7; 45.6                                     | 115.0; 53.8; 45.7                                          | 45.6; 53.6; 115.5                                          |
| α, β, γ (°)                                            | 90.0; 101.0; 90.0                    | 90.0; 102.3; 90.0                                     | 90.0; 102.2; 90.0                                          | 90.0; 101.4; 90.0                                          |
| <sup>a</sup> Resolution, Å                             | 50-1.75 (1.81-<br>1.75)              | 50-2.10 (2.18-<br>2.10)                               | 50-2.40 (2.49-<br>2.40)                                    | 50-2.35 (2.43-<br>2.35)                                    |
| No. of total<br>reflections                            | 468,150                              | 403,526                                               | 184,794                                                    | 730,483                                                    |
| No. of unique<br>reflections                           | 26,882                               | 15,898                                                | 10,774                                                     | 22,740                                                     |
| No. in asymmetric<br>unit                              | 1                                    | 1                                                     | 1                                                          | 2                                                          |
| <sup>a</sup> Completeness, %                           | 96.2 (81.1)                          | 95.3 (90.0)                                           | 96.6 (83.2)                                                | 90.2 (81.3)                                                |
| <sup>a</sup> //σ( <i>I</i> )                           | 21.3 (1.5)                           | 11.5 (1.6)                                            | 13.5 (1.8)                                                 | 13.4 (1.7)                                                 |
| <sup>a</sup> Redundancy                                | 4.6 (2.4)                            | 4.3 (2.6)                                             | 4.9 (2.9)                                                  | 3.9 (2.4)                                                  |
| <sup>b</sup> R <sub>merge</sub> , %                    | 6.5 (42.2)                           | 6.2 (27.2)                                            | 7.2 (26.1)                                                 | 5.1 (23.6)                                                 |
| <sup>a</sup> CC <sub>1/2</sub> , %                     | 99.7 (68.5)                          | 99.7 (80.0)                                           | 99.5 (85.2)                                                | 99.6 (80.7)                                                |
| <b>Refinement</b>                                      |                                      |                                                       |                                                            |                                                            |
| Resolution, Å                                          | 50-1.75 (1.81-<br>1.75)              | 50-2.1 (2.18-<br>2.10)                                | 50-2.4 (2.49-2.40)                                         | 50-2.35 (2.43-<br>2.35)                                    |
| <sup>c</sup> R <sub>cryst</sub> /R <sub>free</sub> , % | 19.2/23.8                            | 17.5/23.0                                             | 21.1/25.1                                                  | 20.2/24.4                                                  |
| No. of protein<br>atoms                                | 2324                                 | 2324                                                  | 2324                                                       | 4648                                                       |
| No. of water<br>molecules                              | 151                                  | 130                                                   | 42                                                         | 75                                                         |
| No. of ligand<br>molecules                             | 0                                    | 1                                                     | 1                                                          | 2                                                          |

|                                          |       |       |       |       |
|------------------------------------------|-------|-------|-------|-------|
| Bond lengths, Å                          | 0.005 | 0.007 | 0.002 | 0.003 |
| Bond angles, °                           | 0.857 | 0.903 | 0.493 | 0.646 |
| Average <i>B</i> -factor, Å <sup>2</sup> | 24.7  | 27.6  | 35.0  | 36.6  |
| Ramachandran analysis                    |       |       |       |       |
| Favored, %                               | 95.3  | 97.6  | 95.6  | 95.2  |
| Allowed, %                               | 4.7   | 2.4   | 4.4   | 4.8   |
| Outliers                                 | 0     | 0     | 0     | 0     |
| Rotamer outliers, %                      | 0.7   | 1.9   | 2.3   | 2.1   |
| PDB entry                                | 9M9N  | 9M9R  | 9MA3  | 9MA6  |

17 <sup>a</sup> Values in parentheses represent statistics for the highest-resolution shell.

18 <sup>b</sup>  $R_{\text{merge}} = \sum_h \sum_i |I(h,i) - \langle I(h) \rangle| / \sum_h \sum_i I(h,i)$ , where  $I(h,i)$  is the intensity of the  $i^{\text{th}}$  measurement  
19 of reflection  $h$  and  $\langle I(h) \rangle$  is the mean value of  $I(h,i)$  for all  $i$  measurements.

20 <sup>c</sup>  $R_{\text{free}}$  was calculated from randomly selected 5% set of reflections not included in the  
21 calculation of the  $R$  value.

22

23

**Extended Data Fig. 1: Size-exclusion chromatography (SEC) elution profiles of SARS-CoV-2 M<sup>pro</sup> wild-type and mutants (T45I,  $\Delta$ 23G, and  $\Delta$ 23G/T45I).**

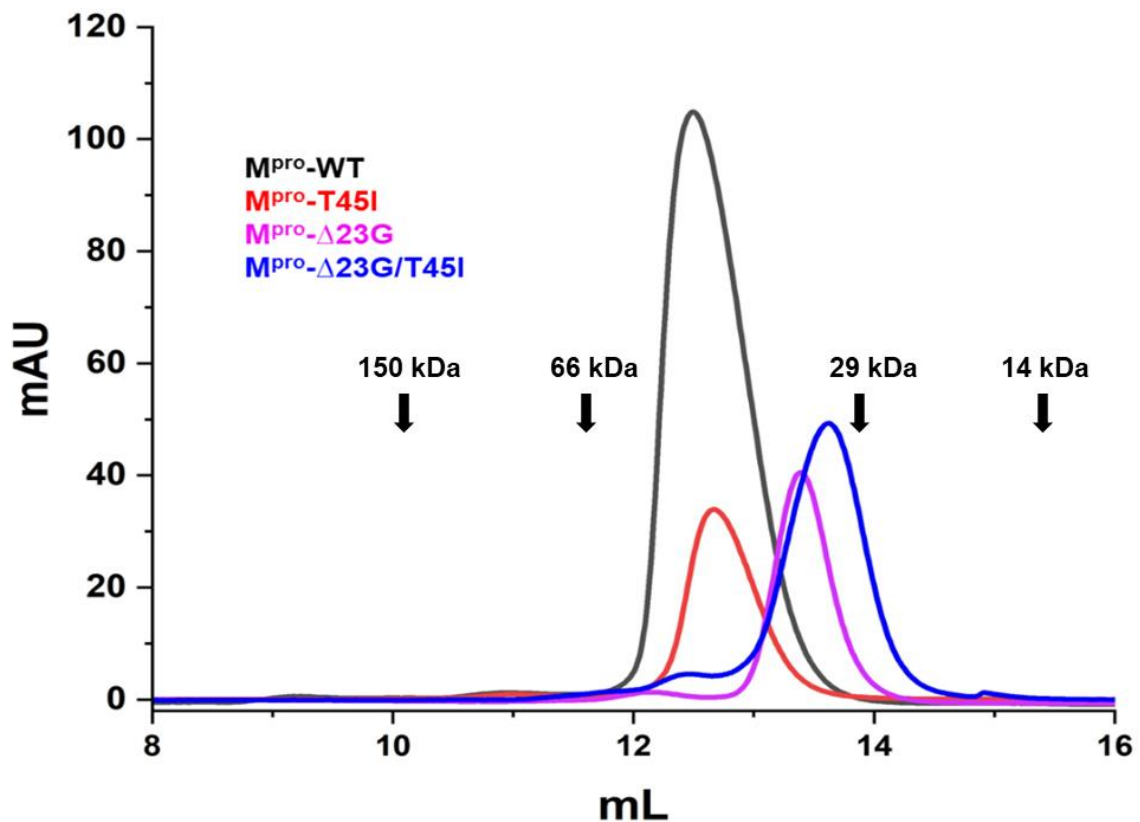

Gel-diltration chromatography was performed using a Superdex 75 prep grade (HiLoad 26/60) column. Elution profiles are shown for M<sup>pro</sup>-WT (black), T45I (red),  $\Delta$ 23G (magenta), and  $\Delta$ 23G/T45I (blue). M<sup>pro</sup>-WT and T45I eluted at volumes corresponding to the molecular mass of a dimer, whereas  $\Delta$ 23G and  $\Delta$ 23G/T45I mutants eluted at volumes consistent with a monomer. Molecular mass standards (with elution volumes indicated in parentheses) were alcohol dehydrogenase (150 kDa, V<sub>0</sub> = 10.04 mL), bovine serum albumin (66 kDa, 11.32 mL), carbonic anhydrase (29 kDa, 13.9 mL), and  $\alpha$ -lactalbumin (14 kDa, 15.5 mL).

**Extended Data Fig. 2: Electron density map showing the nirmatrelvir-binding site of SARS-CoV-2 M<sup>pro</sup> mutants  $\Delta$ 23G and  $\Delta$ 23G/T45I.**

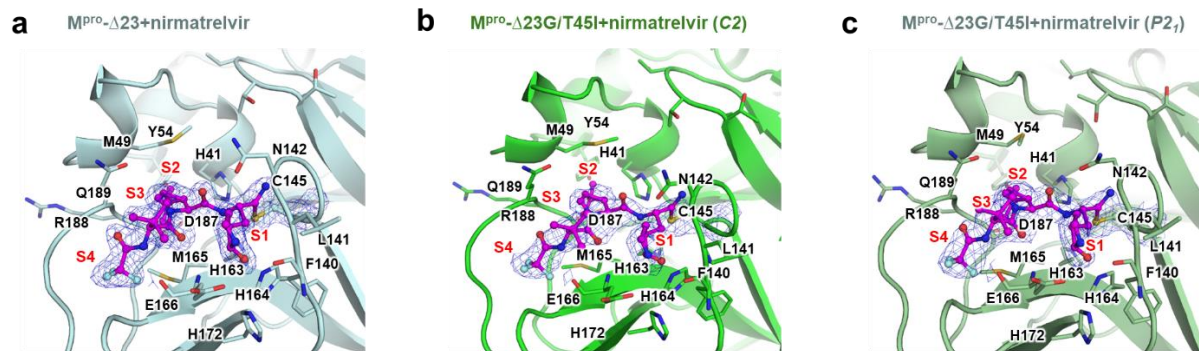

**a–c**, Ribbon diagrams illustrate the inhibitor binding sites of M<sup>pro</sup>- $\Delta$ 23G (**a**, pale cyan), M<sup>pro</sup>- $\Delta$ 23G/T45I in the C2 space group (**b**, green), and M<sup>pro</sup>- $\Delta$ 23G/T45I in the P<sub>21</sub> space group (**c**, pale green). Nirmatrelvir is shown as a stick-and-ball model (magenta), overlaid with a 2Fo-Fc electron density map contoured at 1 $\sigma$ . The key substrate-binding pockets (S1–S4) and interacting residues critical for inhibitor binding are labeled for clarity.

**Extended Data Fig. 3: Structural comparison of SARS-CoV-2 M<sup>pro</sup> mutants ( $\Delta 23G$ ,  $\Delta 23G/T45I$ ) and wild-type M<sup>pro</sup> bound to various inhibitors.**

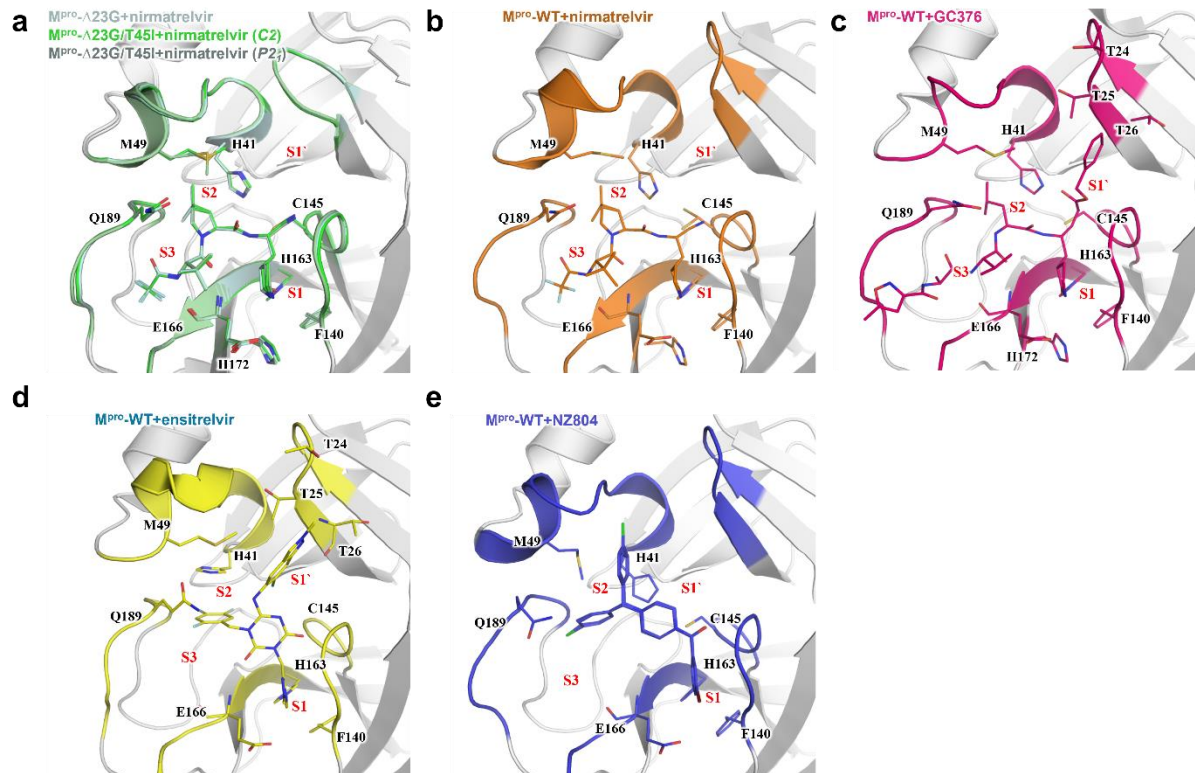

Superposition of crystal structures highlighting inhibitor-binding modes and substrate-binding subsites (S1, S1', S2, and S3). **a**, Structural alignment of M<sup>pro</sup>- $\Delta 23G$  (pale cyan), M<sup>pro</sup>- $\Delta 23G/T45I$  in space group C2 (green), and M<sup>pro</sup>- $\Delta 23G/T45I$  in space group P2<sub>1</sub> (pale green) bound to nirmatrelvir, illustrating structural variations among the mutant complexes. **b–e**, Wild-type M<sup>pro</sup> complexes with nirmatrelvir (**b**, orange, PDB: 7VH8), GC376 (**c**, pink, PDB: 6LU7), ensitrelvir (**d**, yellow, PDB: 8HEF), and NZ804 (**e**, blue, PDB: 8W1T), highlighting critical active-site residues interacting with respective inhibitors. Active-site residues and inhibitors are colored consistently, and key binding pockets are clearly labeled.

**Extended Data Fig. 4: Histopathological assessment of nasal turbinate and lung tissues in Syrian golden hamsters infected with recombinant SARS-CoV-2 variants.**

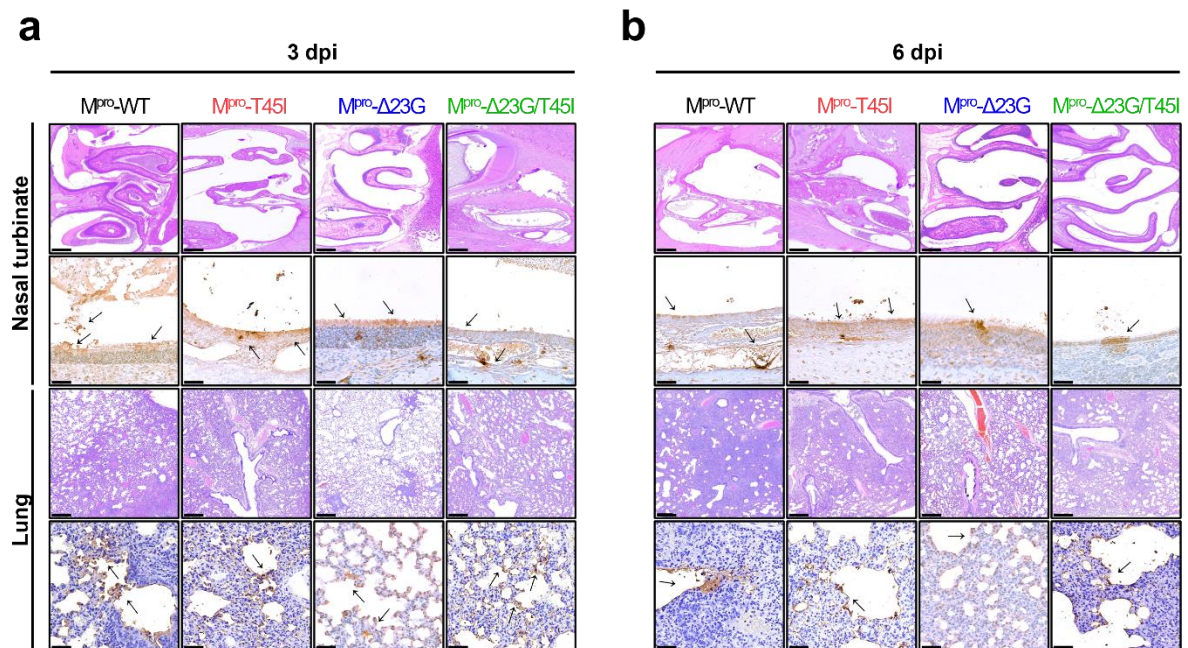

**a,b** Representative images showing Hematoxylin and Eosin (HE, upper rows) staining for tissue pathology and immunohistochemistry (IHC, lower rows) staining for SARS-CoV-2 nucleocapsid antigen detection (brown signals, indicated by arrows) at 3 days post-infection (dpi) (**a**) and 6 dpi (**b**). Scale bars: nasal turbinate HE, 100  $\mu$ m; nasal turbinate IHC, 50  $\mu$ m; lung H&E, 100  $\mu$ m; lung IHC, 20  $\mu$ m. Severe tissue damage and abundant viral antigen were observed in nasal turbinate and lung tissues of hamsters infected with M<sup>pro</sup>-WT and M<sup>pro</sup>-T45I variants. Conversely, tissues infected with  $\Delta$ 23G-containing variants (M<sup>pro</sup>- $\Delta$ 23G and M<sup>pro</sup>- $\Delta$ 23G/T45I) exhibited milder pathology and reduced antigen presence, highlighting attenuation linked to the  $\Delta$ 23G mutation.



**Extended Data Fig. 5: Genetic stability of recombinant SARS-CoV-2 variants after serial passaging in vitro.**

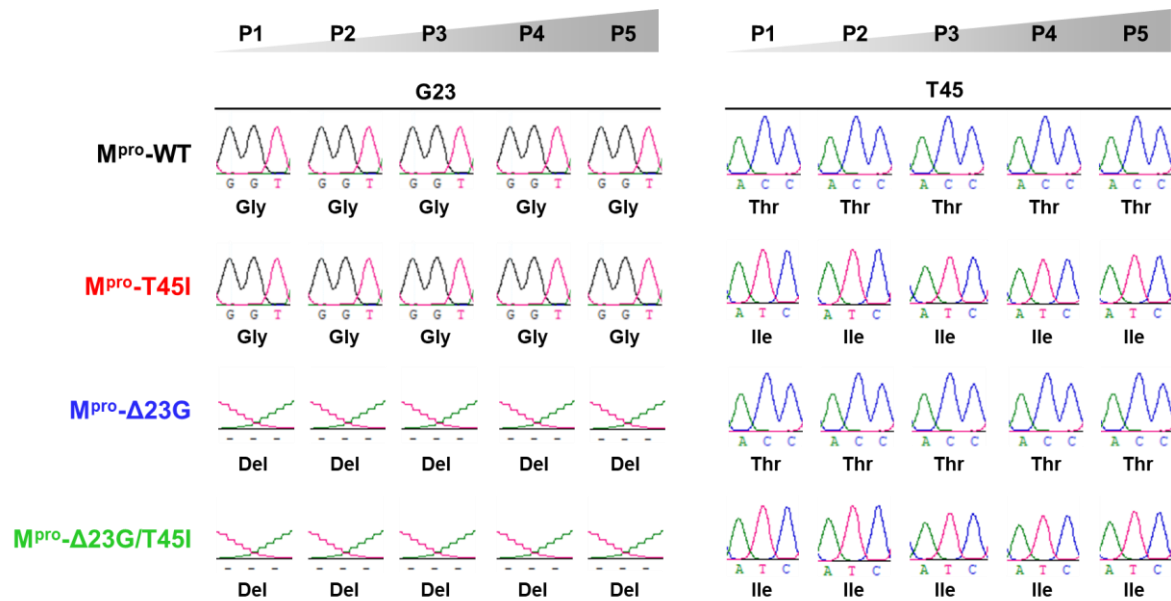

Recombinant SARS-CoV-2 variants (M<sup>pro</sup>-T45I, M<sup>pro</sup>-Δ23G, and M<sup>pro</sup>-Δ23G/T45I) were serially passaged five times in Vero E6 cells at a multiplicity of infection (MOI) of 0.001 without antiviral pressure. Viral RNA extracted after each passage was subjected to Sanger sequencing to assess stability of introduced mutations. Chromatograms of nucleotide sequences encoding the indicated residues (positions 23 and 45) demonstrate stable retention of the engineered mutations across five consecutive passages, highlighting their genetic stability even in the absence of selective antiviral pressure.



**Extended Data Fig. 6: Global sequence analysis of SARS-CoV-2 M<sup>pro</sup> residues 23 and 45.**

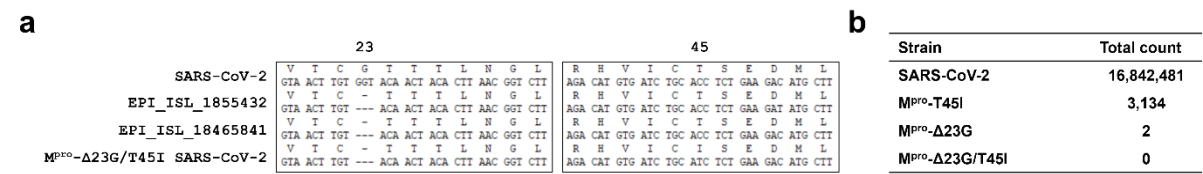

Supplement: Supplementary file 1 [file 9aaf757fcc2d934df6435c0b.pdf]
